# Supplementary material for: Laser Raman tweezer spectroscopy to explore the bisphenol A-induced changes in human erythrocytes
Source: Royal Society of Chemistry journal article supplement (doi:10.1039/c9ra01840a), 2019-01-01
Supplement: c9ra01840a1.pdf [file c9ra01840a1.pdf]

### Supplementary Figure

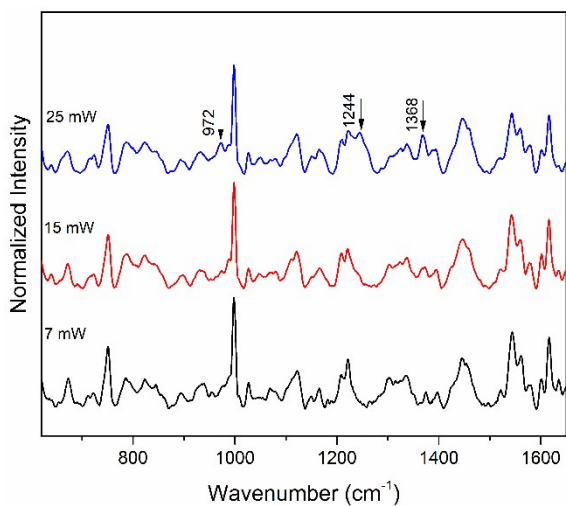

**Figure S1.** Laser power dependent study on RBC. Heme aggregation markers are highlighted by arrows in the figure

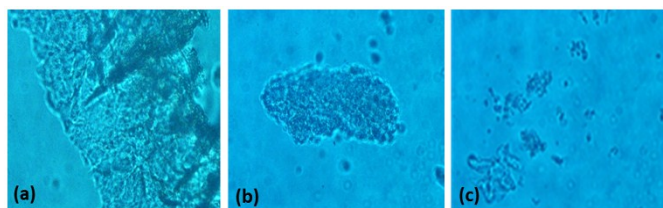

**Figure S2.** Images obtained from three different regions after 45 minutes RBC exposure to ~ 390 µg/ml BPA
